# Supplementary material for: Metabolomic Profiles Associated with Obesity and Periodontitis during Pregnancy: Cross-Sectional Study with Proton Nuclear Magnetic Resonance (1H-NMR)-Based Analysis
Source: MDPI journal article supplement (doi:10.3390/metabo12111029), 2022-10-27
Supplement: s1 [file s1]

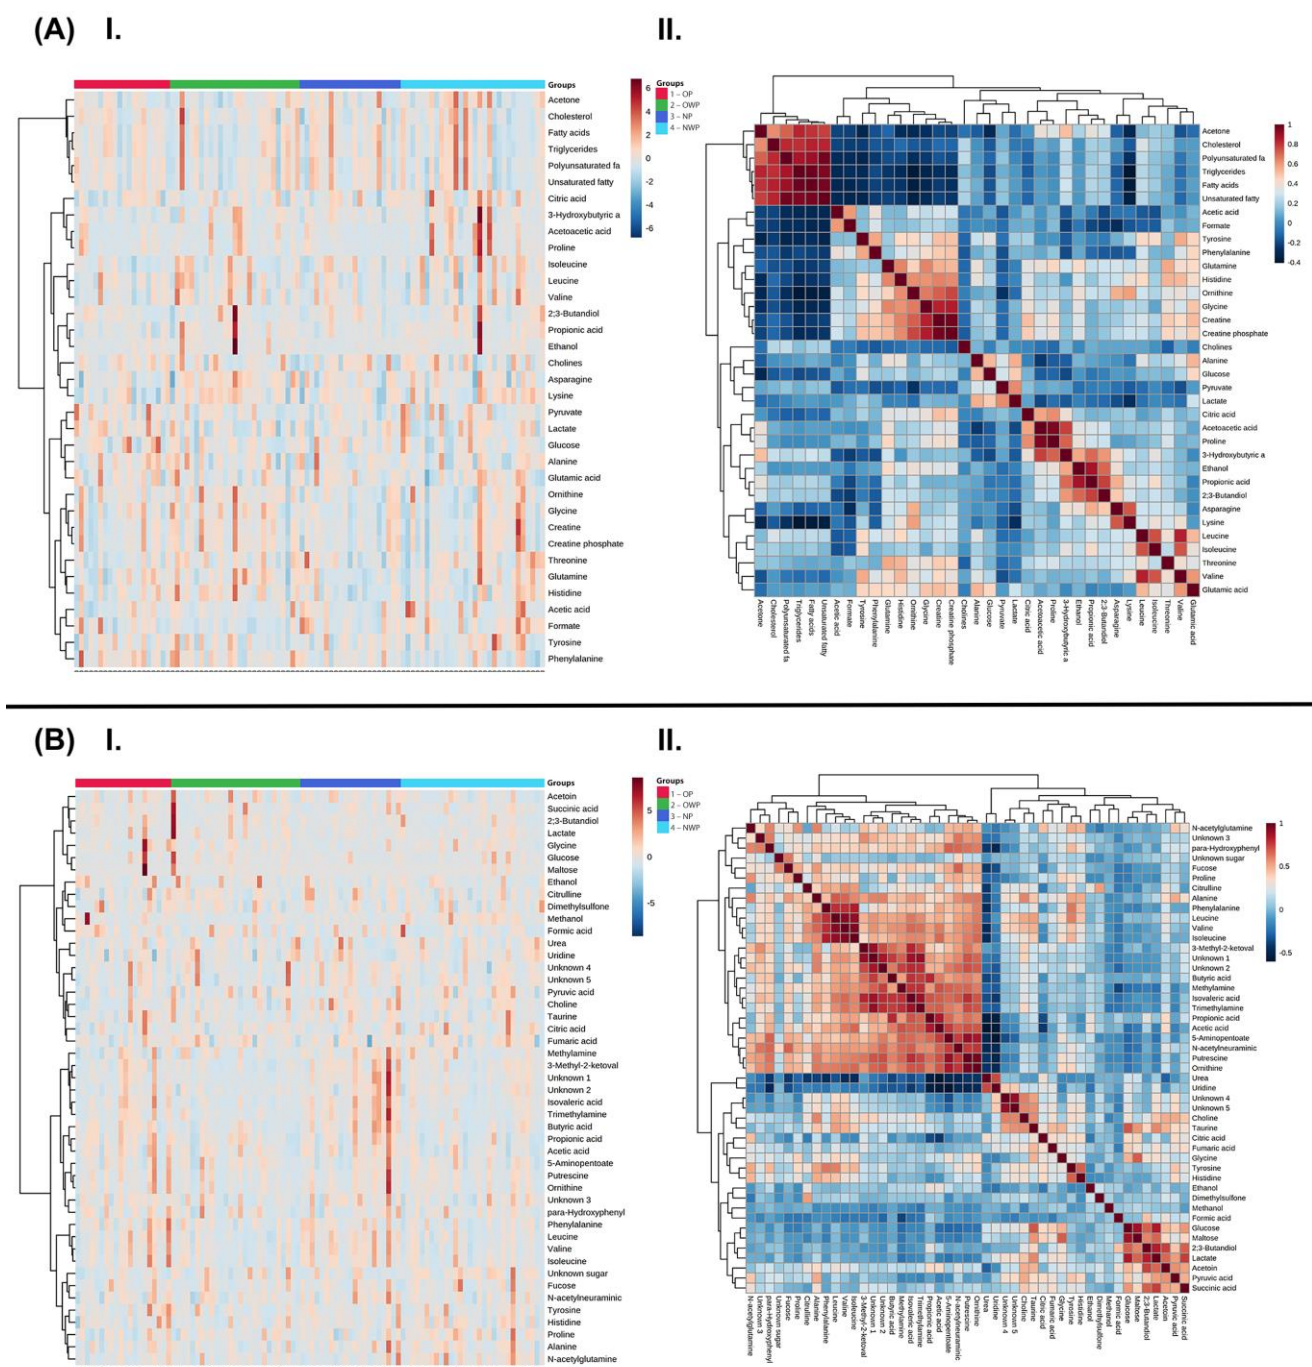

**Figure S1.** Hierarchical cluster analysis (I) and correlations (II) among the identified plasma (A) and saliva (B) metabolites.

**Table S1.** Pearson correlation among plasmatic metabolites and co-variables related to BMI and periodontal parameters.

| Metabolites<br>(chemical shift – ppm) |                     | BMI    | PPD            | CAL            | PS             | Dental plaque | BOP    |
|---------------------------------------|---------------------|--------|----------------|----------------|----------------|---------------|--------|
| <b>Cholesterol (0.59)</b>             | Pearson Correlation | 0.002  | <b>-0.208*</b> | -0.191         | -0.123         | -0.078        | 0.062  |
|                                       | Sig. (2-tailed)     | 0.987  | <b>0.040</b>   | 0.060          | 0.227          | 0.443         | 0.542  |
| <b>Leucine (0.96)</b>                 | Pearson Correlation | 0.116  | <b>-0.205*</b> | <b>-0.211*</b> | <b>-0.204*</b> | -0.039        | 0.040  |
|                                       | Sig. (2-tailed)     | 0.254  | <b>0.042</b>   | <b>0.037</b>   | <b>0.044</b>   | 0.701         | 0.699  |
| Valine (0.98)                         | Pearson Correlation | 0.012  | -0.145         | -0.157         | -0.167         | 0.003         | 0.001  |
|                                       | Sig. (2-tailed)     | 0.909  | 0.154          | 0.124          | 0.100          | 0.979         | 0.992  |
| <b>Isoleucine (1.01)</b>              | Pearson Correlation | -0.160 | <b>-0.241*</b> | <b>-0.255*</b> | <b>-0.246*</b> | -0.143        | -0.100 |
|                                       | Sig. (2-tailed)     | 0.115  | <b>0.017</b>   | <b>0.011</b>   | <b>0.015</b>   | 0.160         | 0.329  |
| <b>Propionic acid (1.07)</b>          | Pearson Correlation | -0.053 | -0.185         | -0.191         | <b>-0.250*</b> | -0.123        | -0.128 |
|                                       | Sig. (2-tailed)     | 0.604  | 0.069          | 0.059          | <b>0.013</b>   | 0.229         | 0.209  |
| 2,3-Butanediol (1.14)                 | Pearson Correlation | -0.016 | -0.126         | -0.129         | -0.121         | -0.013        | -0.090 |
|                                       | Sig. (2-tailed)     | 0.874  | 0.217          | 0.206          | 0.234          | 0.895         | 0.377  |
| Fatty acids (1.17)                    | Pearson Correlation | -0.114 | -0.132         | -0.114         | -0.048         | -0.090        | 0.108  |
|                                       | Sig. (2-tailed)     | 0.263  | 0.195          | 0.263          | 0.639          | 0.379         | 0.289  |
| Ethanol (1.17)                        | Pearson Correlation | 0.045  | -0.125         | -0.124         | -0.163         | -0.122        | -0.121 |
|                                       | Sig. (2-tailed)     | 0.662  | 0.220          | 0.223          | 0.109          | 0.231         | 0.235  |
| <b>3-Hydroxybutyric acid (1.20)</b>   | Pearson Correlation | -0.096 | -0.198         | -0.186         | <b>-0.207*</b> | 0.000         | -0.158 |
|                                       | Sig. (2-tailed)     | 0.347  | 0.050          | 0.066          | <b>0.041</b>   | 0.998         | 0.121  |
| Alanine (1.48)                        | Pearson Correlation | 0.016  | 0.029          | 0.003          | 0.009          | 0.023         | 0.126  |
|                                       | Sig. (2-tailed)     | 0.876  | 0.775          | 0.973          | 0.931          | 0.821         | 0.217  |
| Acetic acid (1.92)                    | Pearson Correlation | -0.126 | 0.039          | 0.025          | -0.057         | -0.051        | 0.034  |
|                                       | Sig. (2-tailed)     | 0.215  | 0.706          | 0.808          | 0.574          | 0.619         | 0.743  |
| Acetone (2.22)                        | Pearson Correlation | -0.181 | -0.182         | -0.171         | -0.113         | -0.119        | -0.017 |
|                                       | Sig. (2-tailed)     | 0.075  | 0.073          | 0.093          | 0.270          | 0.242         | 0.867  |
| <b>Acetoacetic acid (2.27)</b>        | Pearson Correlation | -0.031 | <b>-0.214*</b> | <b>-0.202*</b> | <b>-0.241*</b> | 0.025         | -0.177 |
|                                       | Sig. (2-tailed)     | 0.764  | <b>0.034</b>   | <b>0.046</b>   | <b>0.017</b>   | 0.809         | 0.080  |
| Pyruvate (2.37)                       | Pearson Correlation | -0.027 | -0.056         | -0.068         | -0.041         | -0.039        | -0.104 |
|                                       | Sig. (2-tailed)     | 0.791  | 0.587          | 0.505          | 0.686          | 0.705         | 0.310  |
| Glutamic acid (2.34)                  | Pearson Correlation | -0.022 | 0.059          | 0.067          | 0.104          | 0.063         | 0.165  |
|                                       | Sig. (2-tailed)     | 0.827  | 0.565          | 0.512          | 0.309          | 0.539         | 0.104  |
| Glutamine (2.45)                      | Pearson Correlation | 0.178  | -0.108         | -0.106         | -0.168         | 0.101         | -0.072 |
|                                       | Sig. (2-tailed)     | 0.079  | 0.292          | 0.297          | 0.098          | 0.324         | 0.483  |
| Citric acid (2.53)                    | Pearson Correlation | -0.171 | -0.095         | -0.064         | -0.066         | -0.039        | -0.058 |
|                                       | Sig. (2-tailed)     | 0.092  | 0.353          | 0.531          | 0.516          | 0.702         | 0.573  |
| Polyunsaturated fatty acids (2.63)    | Pearson Correlation | -0.057 | -0.110         | -0.100         | -0.034         | -0.068        | 0.092  |
|                                       | Sig. (2-tailed)     | 0.578  | 0.280          | 0.329          | 0.740          | 0.508         | 0.370  |
| Asparagine (2.87)                     | Pearson Correlation | 0.092  | -0.096         | -0.104         | -0.184         | 0.015         | -0.090 |
|                                       | Sig. (2-tailed)     | 0.366  | 0.348          | 0.308          | 0.069          | 0.886         | 0.380  |
| <b>Lysine (3.02)</b>                  | Pearson Correlation | -0.035 | -0.147         | -0.150         | <b>-0.237*</b> | 0.019         | -0.114 |
|                                       | Sig. (2-tailed)     | 0.735  | 0.149          | 0.141          | <b>0.019</b>   | 0.850         | 0.265  |
| Ornithine (3.05)                      | Pearson Correlation | 0.112  | -0.118         | -0.084         | -0.128         | 0.035         | -0.098 |
|                                       | Sig. (2-tailed)     | 0.272  | 0.249          | 0.411          | 0.211          | 0.730         | 0.338  |
| Choline (3.10)                        | Pearson Correlation | -0.048 | 0.050          | 0.051          | -0.029         | 0.143         | 0.071  |
|                                       | Sig. (2-tailed)     | 0.641  | 0.622          | 0.621          | 0.775          | 0.160         | 0.485  |
| Glycine (3.56)                        | Pearson Correlation | 0.195  | -0.017         | 0.020          | -0.060         | 0.000         | -0.038 |
|                                       | Sig. (2-tailed)     | 0.054  | 0.871          | 0.848          | 0.559          | 0.998         | 0.712  |
| Creatine (3.95)                       | Pearson Correlation | 0.058  | -0.110         | -0.077         | -0.134         | -0.027        | -0.129 |

|                                |                     |                |               |               |                |        |        |
|--------------------------------|---------------------|----------------|---------------|---------------|----------------|--------|--------|
|                                | Sig. (2-tailed)     | 0.573          | 0.281         | 0.451         | 0.189          | 0.789  | 0.206  |
| Creatine phosphate (3.96)      | Pearson Correlation | 0.109          | -0.067        | -0.025        | -0.103         | 0.012  | -0.108 |
|                                | Sig. (2-tailed)     | 0.287          | 0.515         | 0.804         | 0.314          | 0.910  | 0.290  |
| Lactate (4.11)                 | Pearson Correlation | -0.100         | 0.118         | 0.096         | 0.074          | 0.042  | 0.077  |
|                                | Sig. (2-tailed)     | 0.327          | 0.249         | 0.345         | 0.472          | 0.679  | 0.453  |
| Proline (4.15)                 | Pearson Correlation | -0.051         | -0.168        | -0.151        | -0.175         | 0.043  | -0.163 |
|                                | Sig. (2-tailed)     | 0.617          | 0.098         | 0.137         | 0.085          | 0.671  | 0.108  |
| Threonine (4.25)               | Pearson Correlation | -0.150         | -0.157        | -0.138        | -0.172         | 0.042  | -0.045 |
|                                | Sig. (2-tailed)     | 0.141          | 0.122         | 0.175         | 0.090          | 0.679  | 0.663  |
| <b>Glucose (4.65)</b>          | Pearson Correlation | 0.042          | <b>0.239*</b> | <b>0.207*</b> | 0.175          | -0.058 | 0.115  |
|                                | Sig. (2-tailed)     | 0.679          | <b>0.018</b>  | <b>0.041</b>  | 0.085          | 0.573  | 0.259  |
| Triglycerides (5.08)           | Pearson Correlation | -0.129         | -0.111        | -0.098        | -0.025         | -0.083 | 0.135  |
|                                | Sig. (2-tailed)     | 0.206          | 0.276         | 0.338         | 0.810          | 0.417  | 0.187  |
| Unsaturated fatty acids (5.20) | Pearson Correlation | -0.069         | -0.121        | -0.108        | -0.038         | -0.074 | 0.106  |
|                                | Sig. (2-tailed)     | 0.500          | 0.235         | 0.291         | 0.712          | 0.471  | 0.297  |
| Tyrosine (6.90)                | Pearson Correlation | -0.043         | 0.013         | 0.014         | -0.030         | 0.109  | 0.054  |
|                                | Sig. (2-tailed)     | 0.673          | 0.895         | 0.889         | 0.766          | 0.284  | 0.597  |
| <b>Histidine (7.08)</b>        | Pearson Correlation | 0.186          | -0.183        | -0.167        | <b>-0.200*</b> | -0.021 | -0.077 |
|                                | Sig. (2-tailed)     | 0.067          | 0.071         | 0.100         | <b>0.049</b>   | 0.836  | 0.453  |
| <b>Phenylalanine (7.42)</b>    | Pearson Correlation | <b>0.245*</b>  | 0.074         | 0.092         | 0.115          | 0.013  | 0.110  |
|                                | Sig. (2-tailed)     | <b>0.015</b>   | 0.466         | 0.366         | 0.258          | 0.901  | 0.282  |
| <b>Formate (8.45)</b>          | Pearson Correlation | <b>-0.215*</b> | 0.120         | 0.127         | 0.123          | 0.125  | 0.073  |
|                                | Sig. (2-tailed)     | <b>0.033</b>   | 0.240         | 0.213         | 0.228          | 0.221  | 0.473  |

BMI, body mass index; PPD, probing pocket depth; CAL, clinical attachment level; PS, periodontitis stages; BOP, bleeding on probing; \* Correlation is significant at the 0.05 level (2-tailed); \*\* Correlation is significant at the 0.01 level (2-tailed). Metabolite names and values in bold represent statistical difference ( $p < 0.05$ ).

**Table S2.** Pearson correlation among the salivary metabolites and co-variables related to BMI and periodontal parameters.

| Metabolites<br>(chemical shift - ppm) |                     | BMI           | PPD              | CAL              | PS               | Dental<br>plaque | BOP              |
|---------------------------------------|---------------------|---------------|------------------|------------------|------------------|------------------|------------------|
| 3-Methyl-2-ketovaleric<br>acid (0.85) | Pearson Correlation | -0.142        | <b>0.472**</b>   | <b>0.514**</b>   | <b>0.415**</b>   | <b>0.225*</b>    | <b>0.424**</b>   |
|                                       | Sig. (2-tailed)     | 0.164         | <b>&lt;0.001</b> | <b>&lt;0.001</b> | <b>&lt;0.001</b> | <b>0.026</b>     | <b>&lt;0.001</b> |
| Unknown 1 (0.87)                      | Pearson Correlation | -0.185        | <b>0.591**</b>   | <b>0.614**</b>   | <b>0.490**</b>   | <b>0.284**</b>   | <b>0.522**</b>   |
|                                       | Sig. (2-tailed)     | 0.068         | <b>&lt;0.001</b> | <b>&lt;0.001</b> | <b>&lt;0.001</b> | <b>0.005</b>     | <b>&lt;0.001</b> |
| Butyric acid (0.89)                   | Pearson Correlation | -0.006        | <b>0.636**</b>   | <b>0.637**</b>   | <b>0.510**</b>   | <b>0.412**</b>   | <b>0.522**</b>   |
|                                       | Sig. (2-tailed)     | 0.956         | <b>&lt;0.001</b> | <b>&lt;0.001</b> | <b>&lt;0.001</b> | <b>&lt;0.001</b> | <b>&lt;0.001</b> |
| Isovaleric acid (0.91)                | Pearson Correlation | -0.083        | <b>0.556**</b>   | <b>0.562**</b>   | <b>0.467**</b>   | <b>0.374**</b>   | <b>0.550**</b>   |
|                                       | Sig. (2-tailed)     | 0.418         | <b>&lt;0.001</b> | <b>&lt;0.001</b> | <b>&lt;0.001</b> | <b>&lt;0.001</b> | <b>&lt;0.001</b> |
| Leucine (0.97)                        | Pearson Correlation | -0.055        | <b>0.525**</b>   | <b>0.547**</b>   | <b>0.429**</b>   | <b>0.266**</b>   | <b>0.449**</b>   |
|                                       | Sig. (2-tailed)     | 0.592         | <b>&lt;0.001</b> | <b>&lt;0.001</b> | <b>&lt;0.001</b> | <b>0.008</b>     | <b>&lt;0.001</b> |
| Valine (0.99)                         | Pearson Correlation | -0.038        | <b>0.525**</b>   | <b>0.531**</b>   | <b>0.425**</b>   | <b>0.262**</b>   | <b>0.463**</b>   |
|                                       | Sig. (2-tailed)     | 0.708         | <b>&lt;0.001</b> | <b>&lt;0.001</b> | <b>&lt;0.001</b> | <b>0.009</b>     | <b>&lt;0.001</b> |
| Isoleucine (1.01)                     | Pearson Correlation | -0.016        | <b>0.438**</b>   | <b>0.436**</b>   | <b>0.331**</b>   | <b>0.238*</b>    | <b>0.402**</b>   |
|                                       | Sig. (2-tailed)     | 0.879         | <b>&lt;0.001</b> | <b>&lt;0.001</b> | <b>0.001</b>     | <b>0.018</b>     | <b>&lt;0.001</b> |
| Propionic acid (1.06)                 | Pearson Correlation | 0.174         | <b>0.409**</b>   | <b>0.387**</b>   | <b>0.320**</b>   | <b>0.454**</b>   | <b>0.402**</b>   |
|                                       | Sig. (2-tailed)     | 0.086         | <b>&lt;0.001</b> | <b>&lt;0.001</b> | <b>0.001</b>     | <b>&lt;0.001</b> | <b>&lt;0.001</b> |
| 2,3-Butanediol (1.14)                 | Pearson Correlation | <b>0.234*</b> | -0.079           | -0.077           | -0.043           | -0.006           | 0.012            |
|                                       | Sig. (2-tailed)     | <b>0.020</b>  | 0.442            | 0.453            | 0.677            | 0.952            | 0.904            |
| Ethanol (1.18)                        | Pearson Correlation | 0.122         | -0.016           | -0.019           | -0.032           | 0.023            | 0.001            |
|                                       | Sig. (2-tailed)     | 0.231         | 0.874            | 0.855            | 0.752            | 0.825            | 0.992            |
| Fucose (1.25)                         | Pearson Correlation | 0.007         | 0.118            | 0.105            | 0.013            | 0.102            | 0.091            |
|                                       | Sig. (2-tailed)     | 0.948         | 0.248            | 0.305            | 0.895            | 0.317            | 0.371            |
| Acetoin (1.38)                        | Pearson Correlation | 0.144         | 0.099            | 0.109            | 0.084            | 0.064            | 0.136            |
|                                       | Sig. (2-tailed)     | 0.157         | 0.334            | 0.286            | 0.413            | 0.533            | 0.183            |
| Alanine (1.48)                        | Pearson Correlation | -0.057        | <b>0.292**</b>   | <b>0.330**</b>   | 0.169            | 0.133            | 0.194            |
|                                       | Sig. (2-tailed)     | 0.579         | <b>0.004</b>     | <b>0.001</b>     | 0.096            | 0.192            | 0.055            |
| Putrescine (1.76)                     | Pearson Correlation | 0.040         | <b>0.324**</b>   | <b>0.330**</b>   | <b>0.221*</b>    | <b>0.304**</b>   | <b>0.292**</b>   |
|                                       | Sig. (2-tailed)     | 0.692         | <b>0.001</b>     | <b>0.001</b>     | <b>0.029</b>     | <b>0.002</b>     | <b>0.004</b>     |
| Acetic acid (1.92)                    | Pearson Correlation | 0.084         | <b>0.302**</b>   | <b>0.281**</b>   | <b>0.228*</b>    | <b>0.329**</b>   | <b>0.332**</b>   |
|                                       | Sig. (2-tailed)     | 0.411         | <b>0.003</b>     | <b>0.005</b>     | <b>0.024</b>     | <b>0.001</b>     | <b>0.001</b>     |
| N-acetylneuraminic acid<br>(2.21)     | Pearson Correlation | -0.023        | <b>0.327**</b>   | <b>0.332**</b>   | <b>0.224*</b>    | <b>0.254*</b>    | <b>0.276**</b>   |
|                                       | Sig. (2-tailed)     | 0.824         | <b>0.001</b>     | <b>0.001</b>     | <b>0.027</b>     | <b>0.012</b>     | <b>0.006</b>     |
| 5-Aminopentoate (2.24)                | Pearson Correlation | 0.078         | 0.163            | 0.162            | 0.064            | <b>0.220*</b>    | 0.177            |
|                                       | Sig. (2-tailed)     | 0.446         | 0.108            | 0.112            | 0.530            | <b>0.029</b>     | 0.081            |
| N-acetylglutamine (2.33)              | Pearson Correlation | -0.081        | -0.004           | 0.056            | -0.072           | 0.040            | -0.067           |
|                                       | Sig. (2-tailed)     | 0.428         | 0.972            | 0.583            | 0.484            | 0.693            | 0.509            |
| Pyruvic acid (2.37)                   | Pearson Correlation | 0.049         | <b>&lt;0.001</b> | 0.044            | -0.066           | -0.044           | -0.074           |
|                                       | Sig. (2-tailed)     | 0.634         | 0.998            | 0.665            | 0.518            | 0.667            | 0.469            |
| Succinic acid (2.41)                  | Pearson Correlation | <b>0.245*</b> | 0.092            | 0.129            | 0.069            | 0.026            | 0.050            |
|                                       | Sig. (2-tailed)     | <b>0.015</b>  | 0.369            | 0.205            | 0.500            | 0.796            | 0.628            |
| Unknown 2 (2.49)                      | Pearson Correlation | -0.117        | <b>0.442**</b>   | <b>0.474**</b>   | <b>0.328**</b>   | <b>0.231*</b>    | <b>0.373**</b>   |
|                                       | Sig. (2-tailed)     | 0.249         | <b>&lt;0.001</b> | <b>&lt;0.001</b> | <b>0.001</b>     | <b>0.022</b>     | <b>&lt;0.001</b> |
| Citric acid (2.53)                    | Pearson Correlation | -0.025        | -0.031           | 0.038            | -0.018           | -0.021           | -0.022           |
|                                       | Sig. (2-tailed)     | 0.807         | 0.761            | 0.709            | 0.863            | 0.838            | 0.830            |
| Methylamine (2.60)                    | Pearson Correlation | -0.141        | <b>0.291**</b>   | <b>0.303**</b>   | 0.189            | 0.122            | <b>0.290**</b>   |
|                                       | Sig. (2-tailed)     | 0.165         | <b>0.004</b>     | <b>0.002</b>     | 0.062            | 0.232            | <b>0.004</b>     |
| Trimethylamine (2.89)                 | Pearson Correlation | -0.113        | <b>0.555**</b>   | <b>0.556**</b>   | <b>0.455**</b>   | <b>0.298**</b>   | <b>0.568**</b>   |

|                                      |                     |               |                  |                  |                  |                  |                  |
|--------------------------------------|---------------------|---------------|------------------|------------------|------------------|------------------|------------------|
|                                      | Sig. (2-tailed)     | 0.269         | <b>&lt;0.001</b> | <b>&lt;0.001</b> | <b>&lt;0.001</b> | <b>0.003</b>     | <b>&lt;0.001</b> |
| Ornithine (3.06)                     | Pearson Correlation | 0.050         | <b>0.345**</b>   | <b>0.353**</b>   | <b>0.254*</b>    | <b>0.289**</b>   | <b>0.301**</b>   |
|                                      | Sig. (2-tailed)     | 0.627         | <b>0.001</b>     | <b>&lt;0.001</b> | <b>0.012</b>     | <b>0.004</b>     | <b>0.003</b>     |
| Choline (3.20)                       | Pearson Correlation | -0.143        | <b>0.246*</b>    | <b>0.279**</b>   | <b>0.206*</b>    | 0.036            | <b>0.277**</b>   |
|                                      | Sig. (2-tailed)     | 0.159         | <b>0.015</b>     | <b>0.005</b>     | <b>0.042</b>     | 0.722            | <b>0.006</b>     |
| Citrulline (3.14)                    | Pearson Correlation | -0.058        | 0.107            | 0.101            | 0.031            | 0.032            | 0.116            |
|                                      | Sig. (2-tailed)     | 0.570         | 0.293            | 0.322            | 0.762            | 0.755            | 0.257            |
| Dimethylsulfone (3.15)               | Pearson Correlation | -0.024        | -0.044           | -0.045           | -0.008           | -0.059           | 0.017            |
|                                      | Sig. (2-tailed)     | 0.817         | 0.666            | 0.661            | 0.941            | 0.562            | 0.869            |
| Methanol (3.36)                      | Pearson Correlation | -0.084        | -0.082           | -0.082           | -0.100           | -0.057           | -0.125           |
|                                      | Sig. (2-tailed)     | 0.410         | 0.421            | 0.422            | 0.327            | 0.578            | 0.220            |
| Taurine (3.43)                       | Pearson Correlation | 0.083         | <b>0.274**</b>   | <b>0.289**</b>   | 0.181            | 0.075            | <b>0.279**</b>   |
|                                      | Sig. (2-tailed)     | 0.415         | <b>0.006</b>     | <b>0.004</b>     | 0.075            | 0.463            | <b>0.005</b>     |
| Glycine (3.56)                       | Pearson Correlation | <b>0.246*</b> | -0.065           | -0.026           | -0.074           | 0.108            | 0.028            |
|                                      | Sig. (2-tailed)     | <b>0.015</b>  | 0.523            | 0.797            | 0.471            | 0.290            | 0.787            |
| Lactate (4.12)                       | Pearson Correlation | <b>0.225*</b> | -0.010           | 0.003            | -0.059           | -0.111           | 0.014            |
|                                      | Sig. (2-tailed)     | <b>0.026</b>  | 0.923            | 0.974            | 0.564            | 0.278            | 0.892            |
| Proline (4.14)                       | Pearson Correlation | -0.038        | -0.070           | -0.053           | -0.142           | 0.020            | -0.080           |
|                                      | Sig. (2-tailed)     | 0.708         | 0.496            | 0.601            | 0.163            | 0.843            | 0.434            |
| Glucose (5.24)                       | Pearson Correlation | 0.183         | -0.021           | 0.008            | -0.047           | -0.028           | 0.074            |
|                                      | Sig. (2-tailed)     | 0.071         | 0.836            | 0.941            | 0.646            | 0.786            | 0.470            |
| Unknown sugar (5.27)                 | Pearson Correlation | 0.044         | -0.131           | -0.144           | <b>-0.250*</b>   | -0.008           | -0.082           |
|                                      | Sig. (2-tailed)     | 0.666         | 0.198            | 0.157            | <b>0.013</b>     | 0.938            | 0.420            |
| Maltose (5.41)                       | Pearson Correlation | <b>0.215*</b> | -0.098           | -0.061           | -0.067           | 0.025            | 0.042            |
|                                      | Sig. (2-tailed)     | <b>0.033</b>  | 0.339            | 0.549            | 0.512            | 0.811            | 0.680            |
| Urea (5.78)                          | Pearson Correlation | -0.055        | -0.162           | -0.145           | -0.075           | <b>-0.351**</b>  | -0.160           |
|                                      | Sig. (2-tailed)     | 0.593         | 0.111            | 0.154            | 0.465            | <b>&lt;0.001</b> | 0.115            |
| Uridine (5.91)                       | Pearson Correlation | -0.085        | -0.131           | -0.119           | -0.129           | <b>-0.397**</b>  | -0.126           |
|                                      | Sig. (2-tailed)     | 0.404         | 0.200            | 0.243            | 0.205            | <b>&lt;0.001</b> | 0.216            |
| Fumaric acid (6.52)                  | Pearson Correlation | 0.110         | 0.017            | 0.050            | -0.020           | -0.099           | -0.002           |
|                                      | Sig. (2-tailed)     | 0.279         | 0.870            | 0.628            | 0.844            | 0.333            | 0.982            |
| Unknown 3 (6.84)                     | Pearson Correlation | -0.055        | <b>0.292**</b>   | <b>0.317**</b>   | <b>0.256*</b>    | 0.187            | <b>0.223*</b>    |
|                                      | Sig. (2-tailed)     | 0.588         | <b>0.004</b>     | <b>0.001</b>     | <b>0.011</b>     | 0.065            | <b>0.028</b>     |
| para-Hydroxyphenylacetic acid (6.87) | Pearson Correlation | 0.059         | 0.130            | 0.163            | 0.111            | 0.203*           | 0.080            |
|                                      | Sig. (2-tailed)     | 0.567         | 0.203            | 0.108            | 0.277            | 0.045            | 0.433            |
| Tyrosine (6.90)                      | Pearson Correlation | 0.047         | 0.155            | 0.212*           | 0.131            | 0.031            | 0.030            |
|                                      | Sig. (2-tailed)     | 0.643         | 0.128            | 0.036            | 0.200            | 0.765            | 0.771            |
| Histidine (7.07)                     | Pearson Correlation | 0.022         | 0.133            | 0.181            | 0.124            | 0.028            | 0.021            |
|                                      | Sig. (2-tailed)     | 0.831         | 0.191            | 0.074            | 0.223            | 0.785            | 0.836            |
| Phenylalanine (7.43)                 | Pearson Correlation | 0.039         | <b>0.389**</b>   | <b>0.388**</b>   | <b>0.300**</b>   | 0.189            | <b>0.307**</b>   |
|                                      | Sig. (2-tailed)     | 0.706         | <b>&lt;0.001</b> | <b>&lt;0.001</b> | <b>0.003</b>     | 0.063            | <b>0.002</b>     |
| Unknown 4 (8.19)                     | Pearson Correlation | 0.015         | <b>0.287**</b>   | <b>0.305**</b>   | 0.190            | -0.113           | 0.141            |
|                                      | Sig. (2-tailed)     | 0.882         | <b>0.004</b>     | <b>0.002</b>     | 0.061            | 0.268            | 0.165            |
| Unknown 5 (8.21)                     | Pearson Correlation | -0.031        | <b>0.266**</b>   | <b>0.292**</b>   | 0.166            | -0.097           | 0.125            |
|                                      | Sig. (2-tailed)     | 0.760         | <b>0.008</b>     | <b>0.004</b>     | 0.102            | 0.340            | 0.218            |
| Formic acid (8.45)                   | Pearson Correlation | 0.133         | 0.071            | 0.059            | 0.152            | 0.080            | 0.010            |
|                                      | Sig. (2-tailed)     | 0.190         | 0.486            | 0.567            | 0.136            | 0.435            | 0.925            |

BMI, body mass index; PPD, probing pocket depth; CAL, clinical attachment level; PS, periodontitis stages; BOP, bleeding on probing; \* Correlation is significant at the 0.05 level (2-tailed); \*\* Correlation is significant at the 0.01 level (2-tailed). Metabolite names and values in bold represent statistical difference ( $p < 0.05$ ).
